# Supplementary material
Source: publisher figshare collection journal article supplement (https://gsajournals.figshare.com/ndownloader/files/16874843)
Supplement: Supplementary file 1 [file 16874843]

## Sheet: delrmtA_TFs
AFLA_ID	Expression	Description
AFLA_000370	1.15738	hypothetical protein
AFLA_001240	1.52172	beta-glucosidase precursor, putative
AFLA_003100	-1.88514	C2H2 finger domain protein, putative
AFLA_003270	-2.35027	DHHC zinc finger membrane protein
AFLA_003390	-1.11849	TFIIIC transcription initiation factor complex subunits Tfc3
AFLA_003760	1.88623	NACHT domain protein
AFLA_004710	-1.54551	DNA replication licensing factor Mcm5, putative
AFLA_004900	-1.11849	C6 transcription factor, putative
AFLA_006140	-2.40881	hypothetical protein
AFLA_006240	-1.90889	PHD transcription factor (Rum1), putative
AFLA_007150	-1.44018	RNA polymerase TFIIH complex subunit Ssl1, putative
AFLA_008840	-1.99105	DNA topoisomerase II
AFLA_010550	-2.50711	O-methyltransferase family protein
AFLA_010880	1.13521	hypothetical protein
AFLA_010960	-1.12822	C6 finger domain protein, putative
AFLA_011730	-1.26996	DNA-directed RNA polymerase III subunit 22.9 kDa, putative
AFLA_011940	1.49277	C2H2 zinc finger protein
AFLA_012010	1.21457	C6 transcription factor (Ctf1B), putative
AFLA_012100	-1.85344	NDT80_PhoG domain protein PcaG
AFLA_012960	1.1732	endoglycoceramidase, putative
AFLA_015300	-1.60916	L-lactate dehydrogenase, putative
AFLA_015610	2.60857	conserved hypothetical protein
AFLA_016640	1.44294	hypothetical protein
AFLA_017210	1.25016	C2H2 finger domain protein, putative
AFLA_017290	1.08649	conserved hypothetical protein
AFLA_017640	1.95838	C2H2 transcription factor (Rpn4), putative
AFLA_017900	-1.17713	C6 transcription factor FacB/Cat8
AFLA_020060	-1.9104	conserved hypothetical protein
AFLA_020600	1.2929	AT DNA binding protein, putative
AFLA_020730	-1.0552	conserved hypothetical protein
AFLA_022580	-1.463	zinc knuckle domain protein (Byr3), putative
AFLA_025860	2.05572	C6 transcription factor, putative
AFLA_026480	-1.94999	DNA binding protein SART-1, putative
AFLA_027160	1.55094	AAA family ATPase, putative
AFLA_027460	1.90857	C2H2 finger domain protein, putative
AFLA_028760	1.92743	C2H2 transcription factor, putative
AFLA_030390	1.12322	homeobox transcription factor, putative
AFLA_031000	-2.51957	nucleosome binding protein (Nhp6a), putative
AFLA_031340	1.78024	bZIP transcription factor (AtfA), putative
AFLA_031660	-1.40943	transcriptional activator spt7
AFLA_034010	-1.14631	short chain dehydrogenase, putative
AFLA_034020	1.25016	conserved hypothetical protein
AFLA_034060	-1.30135	hypothetical protein
AFLA_034540	-1.92119	stress response transcription factor SrrA/Skn7, putative
AFLA_037470	1.06631	proteasome regulatory particle subunit Rpt4, putative
AFLA_041330	2.81876	C6 transcription factor, putative
AFLA_041520	-1.31197	chromosome segregation protein (Pcs1), putative
AFLA_041540	1.01023	C6 transcription factor Ctf1A, putative
AFLA_042030	-2.64982	C6 transcription factor, putative
AFLA_042930	1.2929	hypothetical protein
AFLA_043400	-1.15791	exosome complex exonuclease Rrp40, putative
AFLA_043410	-1.787	MYB DNA-binding domain protein
AFLA_043760	-1.49337	C2H2 transcription factor (Con7), putative
AFLA_044240	1.22094	hypothetical protein
AFLA_044480	-1.415	DNA replication licensing factor Mcm7, putative
AFLA_044860	1.16744	exonuclease, putative
AFLA_045700	-1.06254	fungal specific transcription factor, putative
AFLA_045950	1.04725	DNA replication licensing factor Mcm4, putative
AFLA_046480	-1.40284	DNA directed RNA polymerase II 15 kDa subunit, putative
AFLA_046770	1.70879	C6 transcription factor, putative
AFLA_054730	-3.40424	SUMO ligase SizA, putative
AFLA_054910	1.06835	tRNA isopentenyltransferase, putative
AFLA_057080	-1.33334	hypothetical protein
AFLA_058610	2.84069	HLH transcription factor, putative
AFLA_061740	-2.35027	C2H2 finger and ankyrin domain protein, putative
AFLA_063410	1.60396	hypothetical protein
AFLA_067910	1.8769	HLH transcription factor, putative
AFLA_069700	1.26918	C2H2 transcription factor, putative
AFLA_069910	1.54315	hypothetical protein
AFLA_070980	-1.21021	C6 transcription factor, putative
AFLA_072500	-1.06893	conserved hypothetical protein
AFLA_072870	-2.35027	conserved hypothetical protein
AFLA_075320	1.01637	C6 transcription factor, putative
AFLA_075420	2.62945	homeobox protein meis, putative
AFLA_076040	1.04003	conserved hypothetical protein
AFLA_076150	1.17447	hypothetical protein
AFLA_076490	-3.10648	RSC complex subunit (RSC8), putative
AFLA_076920	-1.36147	C2H2 finger domain protein, putative
AFLA_078920	1.19193	C2H2 finger domain protein, putative
AFLA_080900	-1.52721	aspartyl-tRNA synthetase, cytoplasmic
AFLA_083340	2.00244	threonyl-tRNA synthetase
AFLA_083820	-2.38468	C6 finger domain protein, putative
AFLA_083860	1.32358	conserved hypothetical protein
AFLA_083990	2.06975	JmjC domain protein, putative
AFLA_084720	-1.11849	C6 transcription factor, putative
AFLA_086590	1.38355	transcription factor smp1, putative
AFLA_087760	-1.18209	40S ribosomal protein S11
AFLA_088130	-1.15791	C6 transcription factor, putative
AFLA_088860	1.05535	acetyltransferase, putative
AFLA_089200	-4.0202	C2H2 finger domain protein, putative
AFLA_089270	3.29334	bZIP transcription factor HacA
AFLA_091310	2.1644	eukaryotic translation initiation factor eIF-1A subunit, putative
AFLA_092280	1.16744	C6 transcription factor (Leu3), putative
AFLA_092410	-1.01753	hypothetical protein
AFLA_094010	2.24387	bZIP transcription factor (Atf21), putative
AFLA_097680	-1.9738	C6 transcription factor, putative
AFLA_097920	1.12538	C6 transcription factor, putative
AFLA_100080	-1.37771	transcription elongation factor S-II
AFLA_100920	-2.17372	C6 transcription factor (Gal4), putative
AFLA_101060	-3.60008	MYB DNA-binding domain protein
AFLA_101280	-1.84207	MYB DNA-binding domain protein
AFLA_102830	-1.41497	C6 transcription factor, putative
AFLA_103290	2.1952	histone H1
AFLA_103490	-1.40603	transcription elongation factor SPT6, putative
AFLA_103520	-2.36117	exosome complex exonuclease Rrp4, putative
AFLA_104070	-1.61999	j domain containing protein, putative
AFLA_105530	1.7656	C6 transcription factor, putative
AFLA_105880	1.7831	hypothetical protein
AFLA_109010	-1.13286	C2H2 finger domain protein, putative
AFLA_109150	-2.17428	C2H2 finger domain protein (Ezf), putative
AFLA_110590	3.39549	DEAD/DEAH box helicase, putative
AFLA_110650	1.15738	C2H2 transcription factor (Seb1), putative
AFLA_110950	1.25294	hypothetical protein
AFLA_112290	1.74734	MYB and HSA domain protein
AFLA_113450	1.06959	bZIP transcription factor (MetR), putative
AFLA_114520	-2.03909	hypothetical protein
AFLA_114650	-2.77737	hypothetical protein
AFLA_115150	-2.17428	flocculation suppression protein
AFLA_116680	3.22639	white collar, putative
AFLA_117820	1.01546	C6 transcription factor, putative
AFLA_118820	1.98697	short-chain dehydrogenase, putative
AFLA_119410	1.32358	RNA helicase-like splicing factor (HRH1), putative
AFLA_119490	1.25016	putative mitochondrial 37S ribosomal protein MRPS12
AFLA_120980	2.19084	zinc finger protein, putative
AFLA_121340	1.0001	C6 finger domain protein, putative
AFLA_122570	1.50832	C6 transcription factor, putative
AFLA_132440	3.56095	siderophore transcription factor SreA
AFLA_132720	-1.17583	MYB DNA binding protein (Tbf1), putative
AFLA_133560	-2.04327	bZIP transcription factor (Fcr3), putative
AFLA_134200	1.47354	autophagy protein (Atg22), putative
AFLA_135050	1.44523	stress activated MAP kinase interacting protein, putative
AFLA_136500	2.07197	OB-fold nucleic acid binding domain protein
AFLA_139170	-2.71945	aflW/ moxY/ monooxygenase
AFLA_139360	-1.33229	aflR / apa-2 / afl-2 / transcription activator
AFLA_139380	1.27602	aflA / fas-2 / hexA / fatty acid synthase alpha subunit

## Sheet: OErmtA_TFs
AFLA_ID	Expression	Description
AFLA_000370	1.16122	hypothetical protein
AFLA_003100	-1.01992	C2H2 finger domain protein, putative
AFLA_003760	2.12681	NACHT domain protein
AFLA_004710	-2.15481	DNA replication licensing factor Mcm5, putative
AFLA_004900	-1.11849	C6 transcription factor, putative
AFLA_006140	-1.31333	hypothetical protein
AFLA_006240	-1.28185	PHD transcription factor (Rum1), putative
AFLA_007150	-1.66156	RNA polymerase TFIIH complex subunit Ssl1, putative
AFLA_008840	-2.29978	DNA topoisomerase II
AFLA_010550	-2.50711	O-methyltransferase family protein
AFLA_010880	1.21001	hypothetical protein
AFLA_010960	-1.22211	C6 finger domain protein, putative
AFLA_011940	1.06151	C2H2 zinc finger protein
AFLA_013090	1.13683	fungal specific transcription factor, putative
AFLA_014490	3.17759	conserved hypothetical protein
AFLA_014760	2.41355	rRNA biogenesis protein RRP5, putative
AFLA_015610	1.79977	conserved hypothetical protein
AFLA_017290	2.50589	conserved hypothetical protein
AFLA_017640	1.13683	C2H2 transcription factor (Rpn4), putative
AFLA_017690	-1.73724	5'->3' exoribonculease Dhp1
AFLA_018410	3.62828	C2H2 transcription factor, putative
AFLA_019820	-1.72428	DNA replication licensing factor Mcm2, putative
AFLA_020060	-1.11277	conserved hypothetical protein
AFLA_020600	3.22206	AT DNA binding protein, putative
AFLA_020730	-1.01861	conserved hypothetical protein
AFLA_021440	-1.28089	hypothetical protein
AFLA_021730	-1.11849	40S ribosomal protein S23
AFLA_022580	-1.463	zinc knuckle domain protein (Byr3), putative
AFLA_025410	-1.19688	C6 finger domain protein, putative
AFLA_025860	1.57424	C6 transcription factor, putative
AFLA_027160	1.69157	AAA family ATPase, putative
AFLA_028560	1.3625	C6 transcription factor (AmdR), putative
AFLA_030600	-1.05047	forkhead transcription factor Fkh1/2, putative
AFLA_034020	1.18122	conserved hypothetical protein
AFLA_041330	2.10664	C6 transcription factor, putative
AFLA_041540	1.05102	C6 transcription factor Ctf1A, putative
AFLA_042030	-1.07127	C6 transcription factor, putative
AFLA_043760	-1.32673	C2H2 transcription factor (Con7), putative
AFLA_044060	1.66194	C2H2 transcription factor (RfeC), putative
AFLA_044480	-1.39028	DNA replication licensing factor Mcm7, putative
AFLA_044860	1.07342	exonuclease, putative
AFLA_045700	-1.49197	fungal specific transcription factor, putative
AFLA_045950	1.71188	DNA replication licensing factor Mcm4, putative
AFLA_046480	-1.24606	DNA directed RNA polymerase II 15 kDa subunit, putative
AFLA_046770	1.28515	C6 transcription factor, putative
AFLA_046870	1.9833	hypothetical protein
AFLA_047370	2.22403	C6 finger domain protein, putative
AFLA_057080	1.03525	hypothetical protein
AFLA_059960	1.83739	hypothetical protein
AFLA_060560	-1.42146	bromodomain associated domain protein
AFLA_061740	-1.25835	C2H2 finger and ankyrin domain protein, putative
AFLA_063410	2.27749	hypothetical protein
AFLA_067020	-1.00173	jumonji family transcription factor, putative
AFLA_067750	-1.01306	hypothetical protein
AFLA_067910	1.123	HLH transcription factor, putative
AFLA_069460	1.58309	C2H2 transcription factor (Egr2), putative
AFLA_069700	1.64592	C2H2 transcription factor, putative
AFLA_069910	1.66881	hypothetical protein
AFLA_070980	-1.68983	C6 transcription factor, putative
AFLA_072870	-2.35027	conserved hypothetical protein
AFLA_075420	1.07342	homeobox protein meis, putative
AFLA_076010	1.89051	zinc finger protein, putative
AFLA_076490	-3.10648	RSC complex subunit (RSC8), putative
AFLA_076500	1.13683	conserved hypothetical protein
AFLA_080900	-1.67271	aspartyl-tRNA synthetase, cytoplasmic
AFLA_081130	1.18316	C2H2 type zinc finger domain protein
AFLA_082090	-1.74089	conserved hypothetical protein
AFLA_083340	1.89398	threonyl-tRNA synthetase
AFLA_083510	1.39019	homeobox and C2H2 transcription factor, putative
AFLA_083820	-2.64856	C6 finger domain protein, putative
AFLA_083940	1.77383	C6 transcription factor (UaY), putative
AFLA_083990	2.87009	JmjC domain protein, putative
AFLA_085170	1.44863	C6 transcription factor OefC
AFLA_087670	-1.06518	triadin, putative
AFLA_089200	-2.73505	C2H2 finger domain protein, putative
AFLA_089270	2.37508	bZIP transcription factor HacA
AFLA_091310	1.41548	eukaryotic translation initiation factor eIF-1A subunit, putative
AFLA_092280	1.78005	C6 transcription factor (Leu3), putative
AFLA_092410	-1.01699	hypothetical protein
AFLA_093980	-1.67281	C6 finger domain protein, putative
AFLA_094460	1.87861	C6 transcription factor, putative
AFLA_096370	1.4854	Zn2Cys6 transcription factor
AFLA_097680	-1.9738	C6 transcription factor, putative
AFLA_100080	-1.69127	transcription elongation factor S-II
AFLA_101060	-1.48609	MYB DNA-binding domain protein
AFLA_101280	-1.59077	MYB DNA-binding domain protein
AFLA_102830	-2.08342	C6 transcription factor, putative
AFLA_103290	1.43022	histone H1
AFLA_103490	-1.17787	transcription elongation factor SPT6, putative
AFLA_103520	-2.82019	exosome complex exonuclease Rrp4, putative
AFLA_104070	-1.02977	j domain containing protein, putative
AFLA_104960	1.88123	O-methyltransferase, putative
AFLA_105360	1.30449	CBF/NF-Y family transcription factor, putative
AFLA_106700	-1.51766	vacuolar protein sorting protein (VPS11), putative
AFLA_109030	1.38718	C6 transcription factor, putative
AFLA_109150	-2.17428	C2H2 finger domain protein (Ezf), putative
AFLA_110590	3.58626	DEAD/DEAH box helicase, putative
AFLA_110950	1.43692	hypothetical protein
AFLA_111330	1.98683	aspartyl-tRNA synthetase, putative
AFLA_112290	2.43313	MYB and HSA domain protein
AFLA_112450	2.22403	DNA methyltransferase 1-associated protein DMAP1
AFLA_114030	1.019	JmjC domain protein, putative
AFLA_114520	-1.30465	hypothetical protein
AFLA_114650	-2.77737	hypothetical protein
AFLA_115150	-1.38828	flocculation suppression protein
AFLA_116680	2.08019	white collar, putative
AFLA_116690	1.09192	hypothetical protein
AFLA_116880	-2.20612	C6 transcription factor, putative
AFLA_117920	1.16122	kinesin family protein (BimC), putative
AFLA_120980	2.92809	zinc finger protein, putative
AFLA_131520	3.88575	arsenite resistance protein Ars2, putative
AFLA_132440	1.81806	siderophore transcription factor SreA
AFLA_132720	-1.2302	MYB DNA binding protein (Tbf1), putative
AFLA_132980	1.019	forkhead domain protein
AFLA_136360	2.6156	GYF domain protein
AFLA_136500	1.21721	OB-fold nucleic acid binding domain protein
AFLA_137350	-1.19365	hypothetical protein
AFLA_138780	-1.14873	hypothetical protein
AFLA_138930	1.20431	C6 transcription factor, putative
AFLA_139250	-2.89562	aflL/ verB/ desaturase/ P450 monooxygenase
AFLA_139360	-1.44449	aflR / apa-2 / afl-2 / transcription activator
